# Supplementary material for: Comparison of single cell sequencing data between two whole genome amplification methods on two sequencing platforms
Source: PubMed Central journal article supplement (PMC5862989; doi:10.1038/s41598-018-23325-2), 2018-03-21
Supplement: 41598_2018_23325_MOESM1_ESM.pdf [file 41598_2018_23325_MOESM1_ESM.pdf]

# **Comparison of single cell sequencing data between two whole genome amplification methods on two sequencing platforms**

DaYang Chen<sup>1,4†</sup>, HeFu Zhen<sup>3,4†</sup>, Yong Qiu<sup>4†</sup>, Ping Liu<sup>4</sup>, Peng Zeng<sup>4</sup>, Jun Xia<sup>4</sup>, QianYu Shi<sup>4</sup>, Lin Xie<sup>4</sup>, Zhu Zhu<sup>4</sup>, Ya Gao<sup>4</sup>, GuoDong Huang<sup>4</sup>, Jian Wang<sup>4,5</sup>, HuanMing Yang<sup>4,5</sup>, Fang Chen<sup>2,4\*</sup>

1, BGI Education Center, University of Chinese Academy of Sciences, Shenzhen, 518083, China

2, Laboratory of Genomics and Molecular Biomedicine, Department of Biology, University of Copenhagen, DK-2100, Copenhagen, Denmark

3, School of Bioscience and Bioengineering, South China University of Technology, Guangzhou 510006, China.

4, BGI-Shenzhen, Shenzhen, China

5, James D. Watson Institute of Genome Sciences, Hangzhou 310058, China

\*Correspondence address. E-mail: Fangchen@genomics.cn

†The authors consider that the first three authors should be regarded as joint First Authors

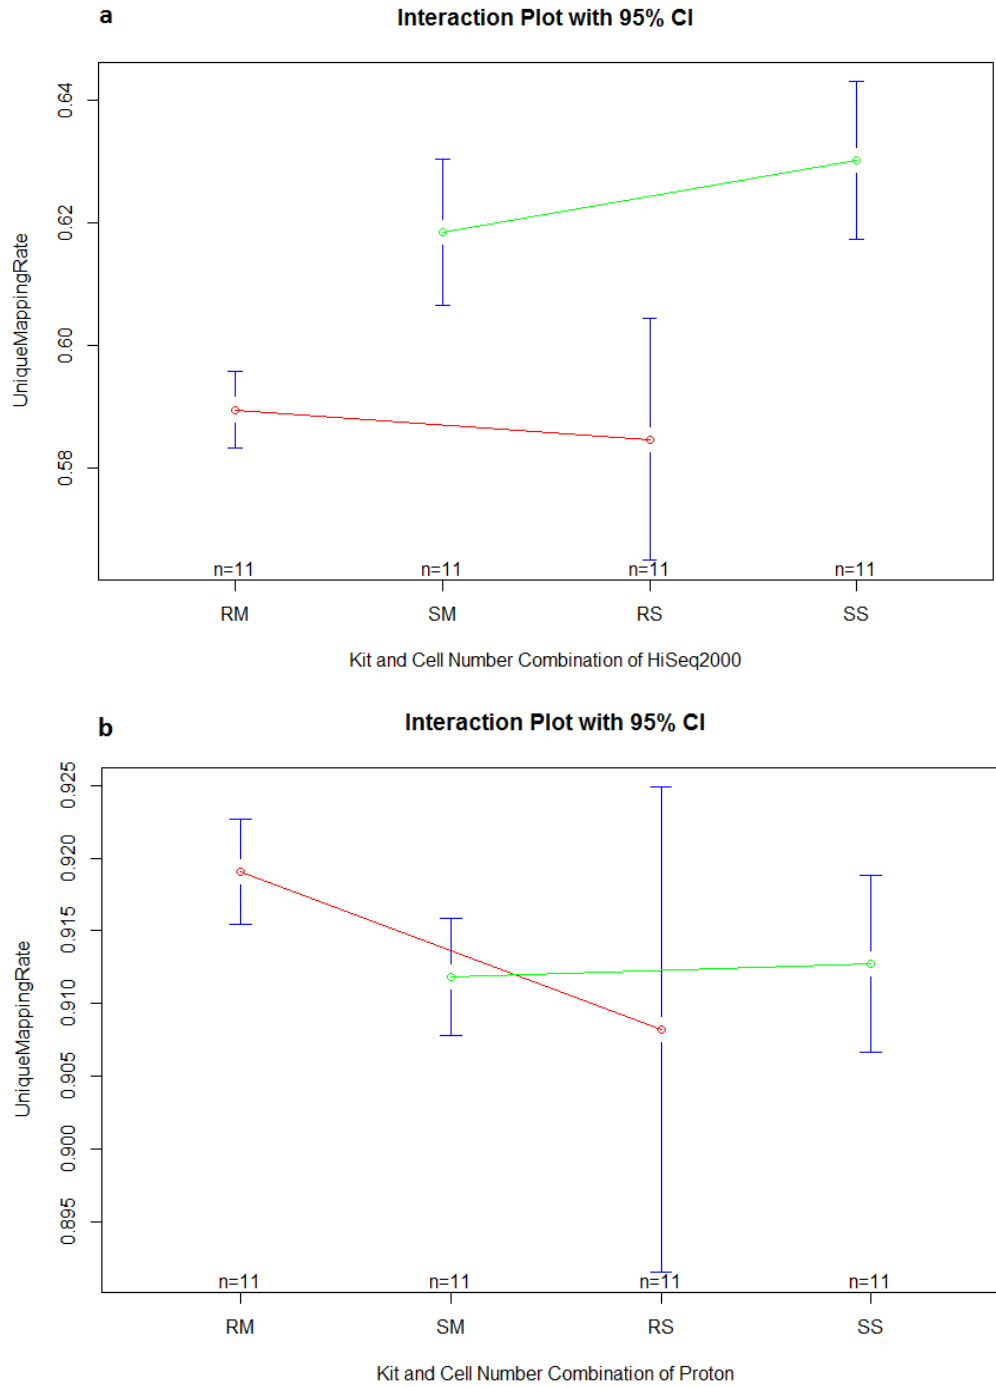

**Figure S1** The interactions effect of WGA Kit and Cell Number for HiSeq2000 (a) and Proton (b). The y-axis is the UniqueMappingRate with different Combination. The figure shows average value, sample number and error bar (95% confidence interval). The color-code lines represented data generated on Rubicon PicoPLEX WGA Kit (red) and Sigma-Aldrich WGA4 kit (green) respectively.

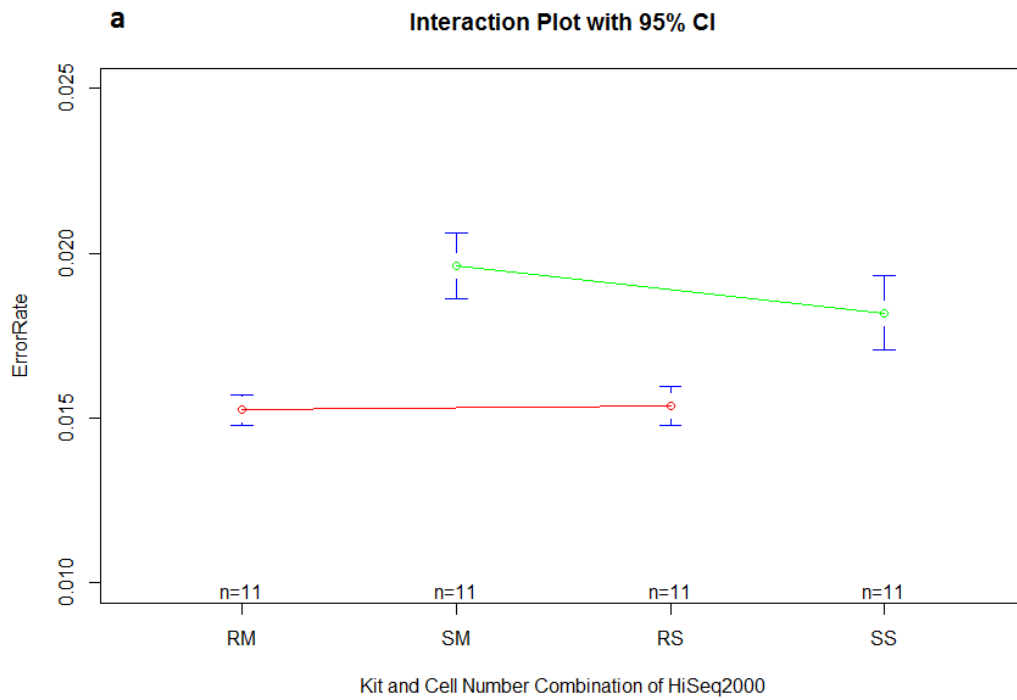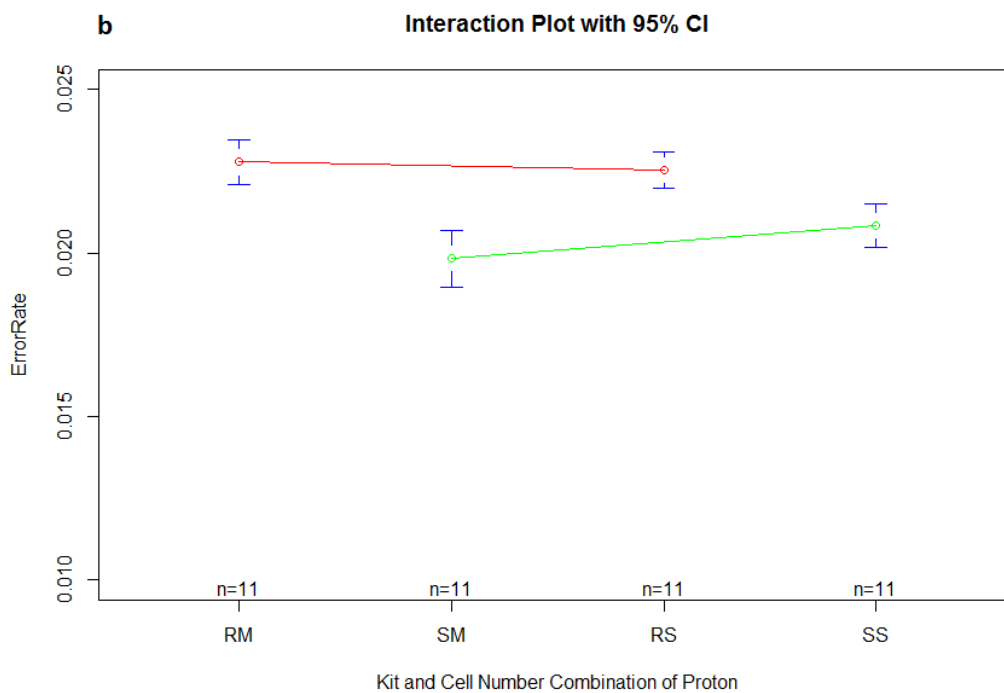

**Figure S2 The interaction effect of Kit and Cell Number for HiSeq2000 (a) and Proton (b).** The y-axis is the ErrorRate with different combination. The figure shows average value, sample number and error bar (95% confidence interval). The color-code lines represented data generated on Rubicon PicoPLEX WGA Kit (red) and Sigma-Aldrich WGA4 kit (green) respectively.

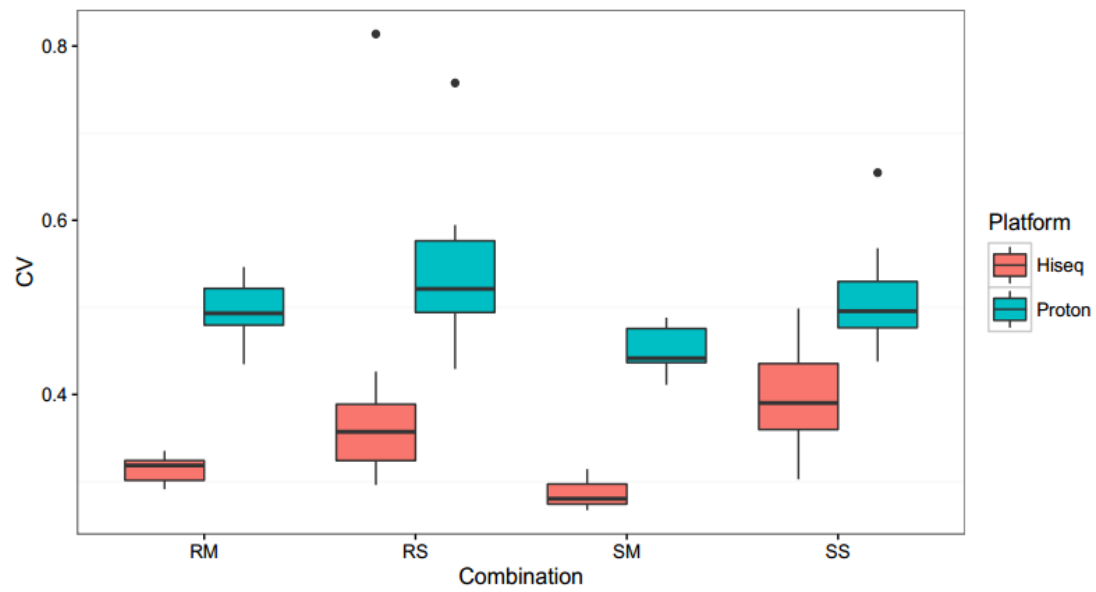

**Figure S3 CV value of 11 samples distribution of four combinations for two platforms.** The y-axis is the CV value and the x-axis is the different combination. HiSeq2000: RM ( $0.31 \pm 0.01$ ), SM ( $0.29 \pm 0.02$ ), RS ( $0.39 \pm 0.14$ ), SS ( $0.40 \pm 0.06$ ); Ion Proton, RM ( $0.50 \pm 0.04$ ), RS ( $0.55 \pm 0.09$ ), SM ( $0.45 \pm 0.03$ ), SS ( $0.51 \pm 0.06$ ).

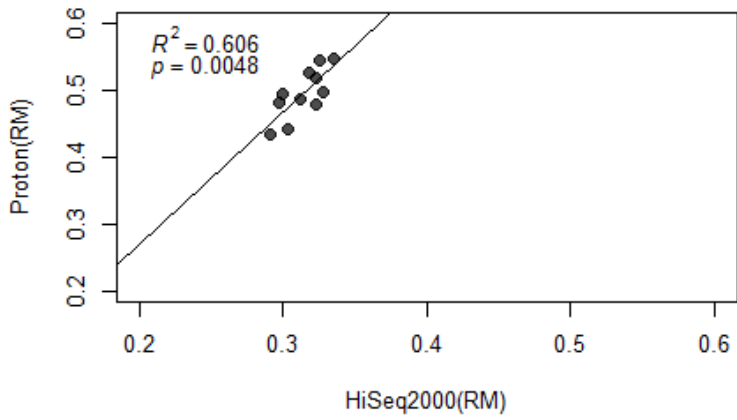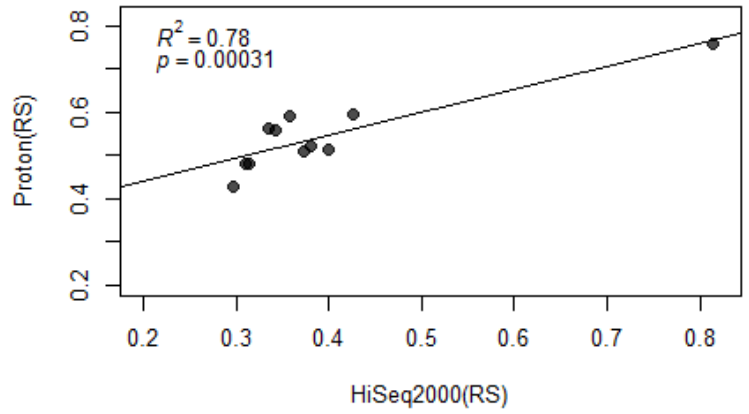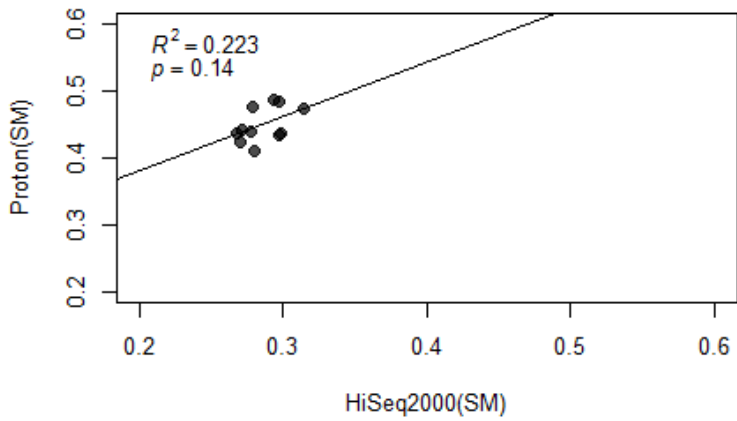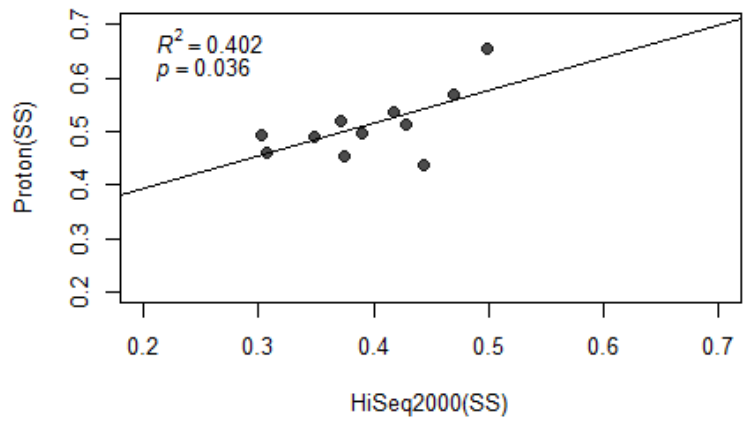

**Figure S4  $R^2$  value of the same combination on two sequencing platforms.** The y-axis is the Ion Proton platform and the x-axis is the Hiseq2000 platform. The  $R^2$  value of RM is 0.61, the  $R^2$  value of RS is 0.78, the  $R^2$  value of SS: 0.40, the  $R^2$  value of SM is 0.22.

**Table I Information of 11 cell lines from Coriell Institute**

| Paper ID | CLID    | Chromosome | Cell Type    | Description                                | ISCN                                                                                       |
|----------|---------|------------|--------------|--------------------------------------------|--------------------------------------------------------------------------------------------|
| CL01     | GM13277 | chrX       | B-Lymphocyte | CHROMOSOME DELETION                        | 46,X,del(X)(q13)                                                                           |
| CL02     | GM13031 | chr17      | B-Lymphocyte | CHROMOSOME DELETION                        | 46,XY,del(17)(q21.3q23)[47]/46,XY[3]                                                       |
| CL03     | GM11419 | chrY       | B-Lymphocyte | ANEUPLOID CHROMOSOME NUMBER - NON-TRISOMIC | 49,XYYYYY                                                                                  |
| CL04     | GM03423 | N/A        | B-Lymphocyte | TRANSLOCATED CHROMOSOME                    | 46,XX,t(1;6)(1qter>1p36::6p23>6pter; 6qter>6p23::1p36>1pter)                               |
| CL05     | GM10918 | chr2       | B-Lymphocyte | CHROMOSOME DELETION                        | 46,XX,del(2)(q34q36)                                                                       |
| CL06     | GM12662 | chrX       | B-Lymphocyte | CHROMOSOME DELETION                        | 46,dup(X)(q28),del(Y)(q11.2).ish del(Y)(q11.2)(DXYS129/DXYS153+,SR Y+,DYZ3+,DYZ1+,Z43206+) |
| CL07     | GM22364 | chr15      | B-Lymphocyte | DUPLICATED CHROMOSOME                      | 46,XY,dup(15)(q11q12).ish dup(15)(q11q12)(D15Z1+,GABRB3 enh,D15S11 enh)                    |
| CL08     | GM11428 | chr3       | B-Lymphocyte | DUPLICATED CHROMOSOME                      | 46,XX,der(3)dup(3q)inv(p26q22)                                                             |
| CL09     | GM50178 | chr5       | B-Lymphocyte | CHROMOSOME DELETION                        | 46,XX,del(5)(p15.3)pat.ish del(5)(p15.3)(C84C11/T3-,D5S23/D5S72 1+,EGR-1+,D5S2907+)pat     |
| CL10     | GM12959 | chr1       | B-Lymphocyte | CHROMOSOME DELETION                        | 46,XY,del(1)(q43)                                                                          |
| CL11     | GM50275 | chr5       | B-Lymphocyte | CHROMOSOME DELETION                        | 46,XY,del(5)(p14p14).ish del(5)(p14p14)(189N21+)                                           |

\*CL04 was regarded as the negative sample because of its unbalanced translocation signal

**Table II The summary of alignment situation of HiSeq2000**

| Sample | Class | Reads (M) | Length | Mapping Rate | Unique Reads | Mismatch Rate | Deletion Rate | Insertion Rate | Uniqe Mapping Rate | Coverage | Coverage of Depth | Duplication Rate |
|--------|-------|-----------|--------|--------------|--------------|---------------|---------------|----------------|--------------------|----------|-------------------|------------------|
| CL01   | RM    | 2         | 29     | 79.32%       | 1192319      | 1.50%         | 0.05%         | 0.05%          | 59.62%             | 0.31%    | 3.84              | 0.96%            |
| CL02   | RM    | 2         | 29     | 79.45%       | 1178514      | 1.47%         | 0.04%         | 0.05%          | 58.93%             | 0.49%    | 2.46              | 0.99%            |
| CL03   | RM    | 2         | 29     | 77.21%       | 1145656      | 1.54%         | 0.05%         | 0.06%          | 57.28%             | 0.24%    | 4.9               | 1.13%            |
| CL04   | RM    | 2         | 29     | 76.40%       | 1158645      | 1.44%         | 0.05%         | 0.05%          | 57.93%             | 0.30%    | 3.87              | 0.99%            |
| CL05   | RM    | 2         | 29     | 79.22%       | 1215406      | 1.33%         | 0.04%         | 0.05%          | 60.77%             | 0.26%    | 4.72              | 0.95%            |
| CL06   | RM    | 2         | 29     | 77.58%       | 1176326      | 1.42%         | 0.04%         | 0.05%          | 58.82%             | 0.29%    | 4.18              | 1.07%            |
| CL07   | RM    | 2         | 29     | 78.54%       | 1177768      | 1.41%         | 0.04%         | 0.05%          | 58.89%             | 0.22%    | 5.51              | 1.11%            |
| CL08   | RM    | 2         | 29     | 77.63%       | 1184942      | 1.43%         | 0.05%         | 0.05%          | 59.25%             | 0.25%    | 4.85              | 1.07%            |
| CL09   | RM    | 2         | 29     | 78.87%       | 1195478      | 1.34%         | 0.04%         | 0.05%          | 59.77%             | 0.42%    | 2.91              | 1.04%            |
| CL10   | RM    | 2         | 29     | 77.59%       | 1170841      | 1.44%         | 0.05%         | 0.06%          | 58.54%             | 0.46%    | 2.6               | 1.03%            |
| CL11   | RM    | 2         | 29     | 78.16%       | 1174172      | 1.39%         | 0.04%         | 0.05%          | 58.71%             | 0.38%    | 3.16              | 1.10%            |
| CL01   | RS    | 2         | 29     | 68.37%       | 1044241      | 1.61%         | 0.05%         | 0.07%          | 52.21%             | 0.12%    | 8.6               | 3.31%            |
| CL02   | RS    | 2         | 29     | 77.49%       | 1193625      | 1.37%         | 0.04%         | 0.05%          | 59.68%             | 0.34%    | 3.54              | 0.75%            |
| CL03   | RS    | 2         | 29     | 78.51%       | 1184833      | 1.53%         | 0.05%         | 0.06%          | 59.24%             | 0.27%    | 4.47              | 0.91%            |
| CL04   | RS    | 2         | 29     | 78.54%       | 1206274      | 1.36%         | 0.05%         | 0.05%          | 60.31%             | 0.42%    | 2.93              | 0.96%            |
| CL05   | RS    | 2         | 29     | 76.65%       | 1182444      | 1.45%         | 0.05%         | 0.06%          | 59.12%             | 0.29%    | 4.09              | 0.94%            |
| CL06   | RS    | 2         | 29     | 79.07%       | 1226832      | 1.36%         | 0.04%         | 0.05%          | 61.34%             | 0.40%    | 3.12              | 0.92%            |
| CL07   | RS    | 2         | 29     | 70.56%       | 1064757      | 1.45%         | 0.05%         | 0.06%          | 53.24%             | 0.41%    | 2.6               | 1.14%            |
| CL08   | RS    | 2         | 29     | 78.09%       | 1204199      | 1.40%         | 0.04%         | 0.05%          | 60.21%             | 0.38%    | 3.26              | 0.89%            |
| CL09   | RS    | 2         | 29     | 78.51%       | 1192598      | 1.37%         | 0.05%         | 0.05%          | 59.63%             | 0.37%    | 3.25              | 0.95%            |
| CL10   | RS    | 2         | 29     | 77.07%       | 1181974      | 1.47%         | 0.05%         | 0.06%          | 59.10%             | 0.20%    | 6.02              | 1.03%            |
| CL11   | RS    | 2         | 29     | 77.79%       | 1181239      | 1.42%         | 0.04%         | 0.05%          | 59.06%             | 0.27%    | 4.51              | 1.13%            |
| CL01   | SM    | 2         | 29     | 85.20%       | 1280654      | 1.96%         | 0.03%         | 0.03%          | 64.03%             | 0.25%    | 5.11              | 1.80%            |
| CL02   | SM    | 2         | 29     | 84.30%       | 1266797      | 1.93%         | 0.03%         | 0.03%          | 63.34%             | 0.27%    | 4.69              | 2.14%            |
| CL03   | SM    | 2         | 29     | 83.11%       | 1203680      | 2.12%         | 0.04%         | 0.03%          | 60.18%             | 0.32%    | 3.79              | 2.00%            |
| CL04   | SM    | 2         | 29     | 82.89%       | 1218049      | 2.12%         | 0.04%         | 0.03%          | 60.90%             | 0.28%    | 4.35              | 1.79%            |
| CL05   | SM    | 2         | 29     | 83.78%       | 1238665      | 1.99%         | 0.04%         | 0.03%          | 61.93%             | 0.34%    | 3.67              | 1.63%            |
| CL06   | SM    | 2         | 29     | 83.10%       | 1174067      | 1.74%         | 0.03%         | 0.03%          | 58.70%             | 0.31%    | 3.88              | 1.85%            |
| CL07   | SM    | 2         | 29     | 84.52%       | 1280201      | 1.83%         | 0.03%         | 0.02%          | 64.01%             | 0.34%    | 3.78              | 2.77%            |
| CL08   | SM    | 2         | 29     | 84.14%       | 1275016      | 1.92%         | 0.03%         | 0.03%          | 63.75%             | 0.35%    | 3.67              | 2.73%            |
| CL09   | SM    | 2         | 29     | 84.10%       | 1222447      | 1.77%         | 0.03%         | 0.03%          | 61.12%             | 0.23%    | 5.28              | 1.90%            |
| CL10   | SM    | 2         | 29     | 84.61%       | 1209815      | 1.69%         | 0.03%         | 0.03%          | 60.49%             | 0.33%    | 3.7               | 1.80%            |
| CL11   | SM    | 2         | 29     | 82.55%       | 1237455      | 1.84%         | 0.03%         | 0.03%          | 61.87%             | 0.40%    | 3.16              | 2.29%            |
| CL01   | SS    | 2         | 29     | 81.83%       | 1259267      | 2.02%         | 0.03%         | 0.03%          | 62.96%             | 0.40%    | 3.22              | 6.04%            |
| CL02   | SS    | 2         | 29     | 73.91%       | 1165444      | 1.42%         | 0.02%         | 0.02%          | 58.27%             | 0.24%    | 4.95              | 2.62%            |
| CL03   | SS    | 2         | 29     | 83.43%       | 1262344      | 1.93%         | 0.03%         | 0.03%          | 63.12%             | 0.52%    | 2.45              | 2.97%            |
| CL04   | SS    | 2         | 29     | 80.55%       | 1225461      | 1.90%         | 0.04%         | 0.03%          | 61.27%             | 0.21%    | 5.98              | 5.65%            |
| CL05   | SS    | 2         | 29     | 84.14%       | 1284989      | 1.79%         | 0.04%         | 0.03%          | 64.25%             | 0.30%    | 4.34              | 3.56%            |
| CL06   | SS    | 2         | 29     | 84.57%       | 1285387      | 1.77%         | 0.03%         | 0.02%          | 64.27%             | 0.26%    | 5.04              | 4.67%            |
| CL07   | SS    | 2         | 29     | 82.61%       | 1257331      | 1.75%         | 0.03%         | 0.02%          | 62.87%             | 0.25%    | 5.16              | 7.85%            |
| CL08   | SS    | 2         | 29     | 85.03%       | 1300106      | 1.74%         | 0.03%         | 0.02%          | 65.01%             | 0.27%    | 4.86              | 4.76%            |
| CL09   | SS    | 2         | 29     | 83.31%       | 1266234      | 1.78%         | 0.03%         | 0.02%          | 63.31%             | 0.30%    | 4.25              | 8.68%            |
| CL10   | SS    | 2         | 29     | 85.04%       | 1299006      | 1.66%         | 0.03%         | 0.02%          | 64.95%             | 0.32%    | 4.13              | 7.90%            |
| CL11   | SS    | 2         | 29     | 82.50%       | 1257374      | 1.65%         | 0.03%         | 0.02%          | 62.87%             | 0.26%    | 4.96              | 4.00%            |

**Table III The summary of alignment situation of Proton**

| Sample | Class | Reads (M) | Production (Mb) | Unique Reads | Unique Map Rate | Length Range | Mismatch Rate | Deletion Rate | Insertion Rate | Gap Rate | Coverage | Coverage OfDepth | Duplication |
|--------|-------|-----------|-----------------|--------------|-----------------|--------------|---------------|---------------|----------------|----------|----------|------------------|-------------|
| CL01   | RM    | 2         | 234.22          | 1850944      | 92.56%          | 30-353       | 1.41%         | 0.36%         | 0.38%          | 0.74%    | 5.50%    | 1.4              | 9.34%       |
| CL02   | RM    | 2         | 237.83          | 1846104      | 92.32%          | 30-349       | 1.44%         | 0.38%         | 0.38%          | 0.77%    | 5.71%    | 1.37             | 7.47%       |
| CL03   | RM    | 2         | 236.3           | 1815073      | 90.82%          | 30-355       | 1.57%         | 0.36%         | 0.38%          | 0.75%    | 5.40%    | 1.42             | 9.88%       |
| CL04   | RM    | 2         | 233.01          | 1831817      | 91.65%          | 30-352       | 1.60%         | 0.35%         | 0.46%          | 0.81%    | 5.52%    | 1.38             | 10.21%      |
| CL05   | RM    | 2         | 232.75          | 1845752      | 92.29%          | 30-346       | 1.40%         | 0.34%         | 0.43%          | 0.77%    | 5.44%    | 1.41             | 11.21%      |
| CL06   | RM    | 2         | 234.76          | 1837414      | 91.84%          | 30-353       | 1.44%         | 0.37%         | 0.45%          | 0.82%    | 5.41%    | 1.42             | 11.18%      |
| CL07   | RM    | 2         | 233.99          | 1831730      | 91.58%          | 30-354       | 1.64%         | 0.40%         | 0.43%          | 0.82%    | 5.41%    | 1.42             | 10.97%      |
| CL08   | RM    | 2         | 233.4           | 1836415      | 91.83%          | 30-352       | 1.46%         | 0.39%         | 0.40%          | 0.79%    | 5.55%    | 1.38             | 9.40%       |
| CL09   | RM    | 2         | 234.5           | 1839317      | 92.05%          | 30-354       | 1.41%         | 0.36%         | 0.43%          | 0.79%    | 5.45%    | 1.41             | 11.38%      |
| CL10   | RM    | 2         | 236.11          | 1836450      | 91.81%          | 30-352       | 1.44%         | 0.35%         | 0.48%          | 0.83%    | 5.49%    | 1.41             | 10.81%      |
| CL11   | RM    | 2         | 231.03          | 1826419      | 91.38%          | 30-353       | 1.53%         | 0.37%         | 0.47%          | 0.84%    | 5.33%    | 1.42             | 11.00%      |
| CL01   | RS    | 2         | 225.54          | 1733874      | 86.72%          | 30-352       | 1.60%         | 0.33%         | 0.42%          | 0.74%    | 3.29%    | 2.12             | 11.34%      |
| CL02   | RS    | 2         | 241.72          | 1858194      | 92.92%          | 30-354       | 1.41%         | 0.35%         | 0.36%          | 0.72%    | 5.63%    | 1.42             | 8.96%       |
| CL03   | RS    | 2         | 238.59          | 1835991      | 91.87%          | 30-354       | 1.52%         | 0.36%         | 0.40%          | 0.77%    | 5.69%    | 1.37             | 7.46%       |
| CL04   | RS    | 2         | 238.53          | 1850111      | 92.46%          | 30-354       | 1.48%         | 0.36%         | 0.38%          | 0.73%    | 5.76%    | 1.36             | 8.46%       |
| CL05   | RS    | 2         | 228.8           | 1838071      | 91.94%          | 30-353       | 1.45%         | 0.33%         | 0.48%          | 0.80%    | 5.33%    | 1.41             | 11.50%      |
| CL06   | RS    | 2         | 236.09          | 1845947      | 92.32%          | 30-353       | 1.46%         | 0.37%         | 0.44%          | 0.81%    | 5.36%    | 1.45             | 12.45%      |
| CL07   | RS    | 2         | 239.61          | 1708914      | 85.45%          | 30-353       | 1.45%         | 0.38%         | 0.45%          | 0.83%    | 4.99%    | 1.47             | 14.00%      |
| CL08   | RS    | 2         | 234.83          | 1842085      | 92.14%          | 30-350       | 1.44%         | 0.36%         | 0.43%          | 0.79%    | 5.41%    | 1.43             | 11.53%      |
| CL09   | RS    | 2         | 227.29          | 1830172      | 91.49%          | 30-352       | 1.42%         | 0.31%         | 0.48%          | 0.79%    | 5.20%    | 1.43             | 12.43%      |
| CL10   | RS    | 2         | 232.43          | 1828760      | 91.44%          | 30-352       | 1.37%         | 0.36%         | 0.43%          | 0.79%    | 5.47%    | 1.39             | 10.07%      |
| CL11   | RS    | 2         | 235.91          | 1837734      | 91.84%          | 30-353       | 1.62%         | 0.38%         | 0.42%          | 0.80%    | 5.55%    | 1.39             | 10.23%      |
| CL01   | SM    | 2         | 211.05          | 1823185      | 91.17%          | 30-346       | 1.27%         | 0.28%         | 0.47%          | 0.76%    | 5.10%    | 1.35             | 10.76%      |
| CL02   | SM    | 2         | 220.97          | 1818568      | 90.90%          | 30-353       | 1.30%         | 0.32%         | 0.49%          | 0.80%    | 5.20%    | 1.38             | 10.84%      |
| CL03   | SM    | 2         | 215.62          | 1802054      | 90.11%          | 30-353       | 1.29%         | 0.33%         | 0.46%          | 0.80%    | 5.04%    | 1.38             | 12.21%      |
| CL04   | SM    | 2         | 210.29          | 1816554      | 90.79%          | 30-352       | 1.32%         | 0.31%         | 0.43%          | 0.75%    | 5.15%    | 1.32             | 10.88%      |
| CL05   | SM    | 2         | 213.05          | 1826736      | 91.33%          | 30-352       | 1.29%         | 0.30%         | 0.46%          | 0.75%    | 5.05%    | 1.37             | 13.04%      |
| CL06   | SM    | 2         | 211.69          | 1815563      | 90.75%          | 30-353       | 1.34%         | 0.30%         | 0.47%          | 0.77%    | 5.18%    | 1.32             | 10.91%      |
| CL07   | SM    | 2         | 221.38          | 1832555      | 91.65%          | 30-353       | 1.27%         | 0.33%         | 0.47%          | 0.79%    | 5.04%    | 1.44             | 12.88%      |
| CL08   | SM    | 2         | 223.45          | 1844279      | 92.15%          | 30-353       | 1.18%         | 0.26%         | 0.35%          | 0.61%    | 5.23%    | 1.4              | 12.54%      |
| CL09   | SM    | 1.92      | 211.61          | 1749051      | 90.98%          | 30-353       | 1.24%         | 0.28%         | 0.33%          | 0.61%    | 4.98%    | 1.38             | 13.51%      |
| CL10   | SM    | 2         | 222.27          | 1825469      | 91.27%          | 30-352       | 1.29%         | 0.27%         | 0.36%          | 0.63%    | 5.35%    | 1.35             | 11.29%      |
| CL11   | SM    | 2         | 227.62          | 1838189      | 91.91%          | 30-354       | 1.12%         | 0.28%         | 0.36%          | 0.64%    | 5.29%    | 1.41             | 12.84%      |
| CL01   | SS    | 2         | 217.54          | 1842068      | 92.07%          | 30-355       | 1.26%         | 0.31%         | 0.48%          | 0.79%    | 4.63%    | 1.54             | 12.52%      |
| CL02   | SS    | 2         | 222.21          | 1804517      | 90.25%          | 30-354       | 1.36%         | 0.33%         | 0.51%          | 0.83%    | 4.94%    | 1.45             | 10.98%      |
| CL03   | SS    | 2         | 215.09          | 1807415      | 90.38%          | 30-354       | 1.19%         | 0.32%         | 0.49%          | 0.80%    | 4.84%    | 1.43             | 11.95%      |
| CL04   | SS    | 2         | 218.02          | 1795544      | 89.79%          | 30-352       | 1.39%         | 0.34%         | 0.49%          | 0.83%    | 4.48%    | 1.56             | 12.75%      |
| CL05   | SS    | 2         | 211.41          | 1825169      | 91.28%          | 30-352       | 1.35%         | 0.30%         | 0.51%          | 0.81%    | 4.77%    | 1.44             | 12.33%      |
| CL06   | SS    | 2         | 219.45          | 1832564      | 91.62%          | 30-353       | 1.28%         | 0.35%         | 0.48%          | 0.83%    | 4.64%    | 1.55             | 13.65%      |
| CL07   | SS    | 2         | 219.64          | 1819845      | 91.01%          | 30-354       | 1.38%         | 0.31%         | 0.51%          | 0.83%    | 4.17%    | 1.71             | 15.15%      |
| CL08   | SS    | 2         | 227.08          | 1841986      | 92.12%          | 30-349       | 1.28%         | 0.28%         | 0.39%          | 0.66%    | 4.83%    | 1.55             | 13.64%      |
| CL09   | SS    | 2         | 226.37          | 1841177      | 92.04%          | 30-354       | 1.33%         | 0.28%         | 0.40%          | 0.68%    | 4.15%    | 1.79             | 15.38%      |
| CL10   | SS    | 2         | 229.66          | 1839407      | 91.96%          | 30-353       | 1.29%         | 0.30%         | 0.39%          | 0.69%    | 4.19%    | 1.8              | 17.41%      |
| CL11   | SS    | 2         | 226.69          | 1838385      | 91.90%          | 30-354       | 1.34%         | 0.30%         | 0.39%          | 0.69%    | 4.94%    | 1.5              | 11.95%      |



**Table IV Detection results summary**

| Sample Name | Class | SNP array                        | Hiseq2000_Karyotype |        |                                                                       | Proton_Karyotype |        |                                                                                           |
|-------------|-------|----------------------------------|---------------------|--------|-----------------------------------------------------------------------|------------------|--------|-------------------------------------------------------------------------------------------|
|             |       |                                  | CV                  | Status | False positive signals                                                | CV               | Status | False positive signals                                                                    |
| CL01-RS     | RS    | 46,X,del(X)(q13)                 | 0.8138              | Fail   |                                                                       | 0.7576           | Fail   |                                                                                           |
| CL02-RS     | RS    | 46,XY,<br>del(17)(q21.3q23)      | 0.3983              | √      | del(7q11.21-<br>7q11.23)(14.74M)<br>dup(13q14.11-<br>13q14.3)(12.32M) | 0.5135           | ×      | dup(Xq21.1-Xq21.32)(15.37M)<br>del(13q13.2-13q14.3)(27.62M)<br>dup(Yp11.31-Yp11.2)(5.02M) |
| CL03-RS     | RS    | 49,YYYYYY                        | 0.3724              | √      |                                                                       | 0.5095           | √      |                                                                                           |
| CL04-RS     | RS    | 46,XX,t(1;6)                     | 0.3139              | N      |                                                                       | 0.4787           | N      |                                                                                           |
| CL05-RS     | RS    | 46,XX,<br>del(2)(q34q36)         | 0.2961              | √      |                                                                       | 0.4293           | √      |                                                                                           |
| CL06-RS     | RS    | 46,dup(X)(q28),del(<br>Y)(q11.2) | 0.4264              | ×      | del(15q11.2-<br>15q13.3)(8.98M)                                       | 0.5946           | ×      |                                                                                           |
| CL07-RS     | RS    | 46,XY,<br>dup(15)(q11q12)        | 0.3572              | √      |                                                                       | 0.5909           | √      | dup(Yp11.31-Yq12)(26.16M)<br>dup(Xq11.1-Xq21.1)(31.27M)                                   |
| CL08-RS     | RS    | 46,XX,<br>dup(3q)(p26q22)        | 0.3793              | √      | del(9p13.2-<br>9p11.2)(8.10M)                                         | 0.5212           | √      |                                                                                           |
| CL09-RS     | RS    | 46,XX,del(5)(p15.3)              | 0.3092              | √      |                                                                       | 0.4789           | √      |                                                                                           |
| CL10-RS     | RS    | 46,XY,del(1)(q43)                | 0.3344              | √      |                                                                       | 0.5619           | √      | dup(Yp11.31-Yq12)(26.16M)<br>dup(Xq11.1-Xq21.1)(16.88M)                                   |
| CL11-RS     | RS    | 46,XY,<br>del(5)(p14p14)         | 0.3429              | √      |                                                                       | 0.5588           | √      | dup(Yp11.31-Yp11.2)(5.76M)                                                                |
| CL01-RM     | RM    | 46,X,del(X)(q13)                 | 0.3029              | √      |                                                                       | 0.4424           | √      |                                                                                           |
| CL02-RM     | RM    | 46,XY,<br>del(17)(q21.3q23)      | 0.3276              | √      |                                                                       | 0.4981           | √      | dup(Yp11.31-Yq12)(26.16M)<br>dup(Xq11.1-Xq21.1)(13.93M)                                   |
| CL03-RM     | RM    | 49,YYYYYY                        | 0.3226              | √      |                                                                       | 0.4774           | √      | dup(Xq11.1-Xq21.32)(39.81M)                                                               |
| CL04-RM     | RM    | 46,XX,t(1;6)                     | 0.2968              | N      |                                                                       | 0.4819           | N      |                                                                                           |
| CL05-RM     | RM    | 46,XX,<br>del(2)(q34q36)         | 0.2913              | √      |                                                                       | 0.4347           | √      |                                                                                           |

|         |    |                              |        |   |                                                                    |        |   |                                                          |
|---------|----|------------------------------|--------|---|--------------------------------------------------------------------|--------|---|----------------------------------------------------------|
| CL06-RM | RM | 46,dup(X)(q28),del(Y)(q11.2) | 0.323  | × |                                                                    | 0.5187 | × |                                                          |
| CL07-RM | RM | 46,XY,<br>dup(15)(q11q12)    | 0.3354 | × |                                                                    | 0.5464 | √ | dup(Xq11.1-Xq21.1)(14.93M)                               |
| CL08-RM | RM | 46,XX,<br>dup(3q)(p26q22)    | 0.3121 | √ |                                                                    | 0.4861 | √ |                                                          |
| CL09-RM | RM | 46,XX,del(5)(p15.3)          | 0.3    | √ |                                                                    | 0.4932 | √ |                                                          |
| CL10-RM | RM | 46,XY,del(1)(q43)            | 0.3186 | √ |                                                                    | 0.5248 | √ | dup(Xq11.1-Xq21.1)(16.88M)                               |
| CL11-RM | RM | 46,XY,<br>del(5)(p14p14)     | 0.3255 | √ |                                                                    | 0.544  | √ | dup(Yp11.31-Yq12)(26.16M)                                |
| CL01-SS | SS | 46,X,del(X)(q13)             | 0.3903 | √ |                                                                    | 0.4957 | √ |                                                          |
| CL02-SS | SS | 46,XY,<br>del(17)(q21.3q23)  | 0.4988 | √ | del(7q11.21-<br>7q11.22)(9.86M)                                    | 0.6546 | √ |                                                          |
| CL03-SS | SS | 49,XYYYYY                    | 0.3027 | √ |                                                                    | 0.494  | √ |                                                          |
| CL04-SS | SS | 46,XX,t(1;6)                 | 0.4431 | N |                                                                    | 0.4379 | N |                                                          |
| CL05-SS | SS | 46,XX,<br>del(2)(q34q36)     | 0.3076 | √ |                                                                    | 0.4624 | √ |                                                          |
| CL06-SS | SS | 46,dup(X)(q28),del(Y)(q11.2) | 0.3711 | × | del(7q11.21-<br>7q11.23)(14.24M)<br>dup(11q11-<br>11q14.1)(25.20M) | 0.5217 | × | dup(11q11-11q14.1)(27.81M)                               |
| CL07-SS | SS | 46,XY,<br>dup(15)(q11q12)    | 0.469  | × | dup(Xq11.1-<br>Xq21.1)(15.22M)                                     | 0.568  | × | dup(Xq11.1-Xq21.1)(18.22M)                               |
| CL08-SS | SS | 46,XX,<br>dup(3q)(p26q22)    | 0.3741 | √ |                                                                    | 0.4542 | √ | dup(9q12-9q21.11)(6.41M)                                 |
| CL09-SS | SS | 46,XX,del(5)(p15.3)          | 0.4279 | × |                                                                    | 0.5149 | √ | del(9p13.2-9p11.2)(8.54M)                                |
| CL10-SS | SS | 46,XY,del(1)(q43)            | 0.4179 | √ |                                                                    | 0.5377 | √ | dup(Xq13.2-Xq22.1)(27.14M)                               |
| CL11-SS | SS | 46,XY,<br>del(5)(p14p14)     | 0.3485 | √ |                                                                    | 0.4909 | √ | dup(Yp11.31-Yp11.2)(5.72M)<br>dup(Xq11.1-Xq21.1)(15.95M) |
| CL01-SM | SM | 46,X,del(X)(q13)             | 0.271  | √ |                                                                    | 0.4435 | √ |                                                          |

|         |    |                                  |        |   |                                                               |        |   |                                                           |
|---------|----|----------------------------------|--------|---|---------------------------------------------------------------|--------|---|-----------------------------------------------------------|
| CL02-SM | SM | 46,XY,<br>del(17)(q21.3q23)      | 0.2973 | √ |                                                               | 0.4851 | √ |                                                           |
| CL03-SM | SM | 49,XYYYY                         | 0.279  | √ |                                                               | 0.4778 | √ |                                                           |
| CL04-SM | SM | 46,XX,t(1;6)                     | 0.2672 | N |                                                               | 0.4379 | N |                                                           |
| CL05-SM | SM | 46,XX,<br>del(2)(q34q36)         | 0.2804 | √ |                                                               | 0.4111 | √ |                                                           |
| CL06-SM | SM | 46,dup(X)(q28),del(<br>Y)(q11.2) | 0.299  | × | dup(Xq11.1-<br>Xq21.1)(21.27M)                                | 0.4385 | × | dup(Xq11.2-Xq21.1)(17.14M)                                |
| CL07-SM | SM | 46,XY,<br>dup(15)(q11q12)        | 0.3144 | × | dup(9q12-<br>9q21.11)(5.89M)                                  | 0.4736 | × | dup(Xp11.22-Xp11.21)(5.99M)<br>dup(Xq11.1-Xq21.1)(16.69M) |
| CL08-SM | SM | 46,XX,<br>dup(3q)(p26q22)        | 0.2774 | √ |                                                               | 0.4416 | √ |                                                           |
| CL09-SM | SM | 46,XX,del(5)(p15.3)              | 0.27   | √ |                                                               | 0.4256 | √ | dup(9q12-9q21.11)(5.87M)                                  |
| CL10-SM | SM | 46,XY,del(1)(q43)                | 0.2973 | √ | dup(Xq11.1-<br>Xq21.33)(34.28M)<br>dup(Xq23-<br>Xq25)(12.63M) | 0.4353 | √ | dup(Xp11.3-Xp11.21)(12.55M)                               |
| CL11-SM | SM | 46,XY,<br>del(5)(p14p14)         | 0.2935 | √ |                                                               | 0.4882 | √ | dup(Xq11.1-Xq21.1)(37.91)                                 |

“√” represents that the detection results are consistent with the standard results

“X” represents that detection failed

“Fail” represents that sample quality failed

“N” represents the negative sample

**Table V All the detection results for two platforms**

| <b>Combinations</b> | <b>Index</b> | <b>HiSeq2000</b> | <b>Proton</b> |
|---------------------|--------------|------------------|---------------|
| RM                  | FNR          | 2/11             | 1/11          |
| RM                  | TNR          | 1/1              | 1/1           |
| RM                  | FPR          | 0/11             | 6/11          |
| RM                  | TPR          | 8/11             | 9/11          |
| RS                  | FNR          | 1/10             | 2/10          |
| RS                  | TNR          | 1/1              | 1/1           |
| RS                  | FPR          | 4/10             | 8/10          |
| RS                  | TPR          | 8/10             | 7/10          |
| SS                  | FNR          | 3/11             | 2/11          |
| SS                  | TNR          | 1/1              | 1/1           |
| SS                  | FPR          | 4/11             | 7/11          |
| SS                  | TPR          | 7/11             | 8/11          |
| SM                  | FNR          | 2/11             | 2/11          |
| SM                  | TNR          | 1/1              | 1/1           |
| SM                  | FPR          | 4/11             | 6/11          |
| SM                  | TPR          | 8/11             | 8/11          |
